# Supplementary material for: Roles of the α1B-Adrenergic Receptor Phosphorylation Domains in Signaling and Internalization
Source: MDPI journal article supplement (doi:10.3390/ijms242316963), 2023-11-30
Supplement: s1 [file s1]

## SUPPLEMENTARY MATERIAL

**Figure S1.** Cartoon showing the substitutions performed in the  $\alpha_{1B}$ -

AR.

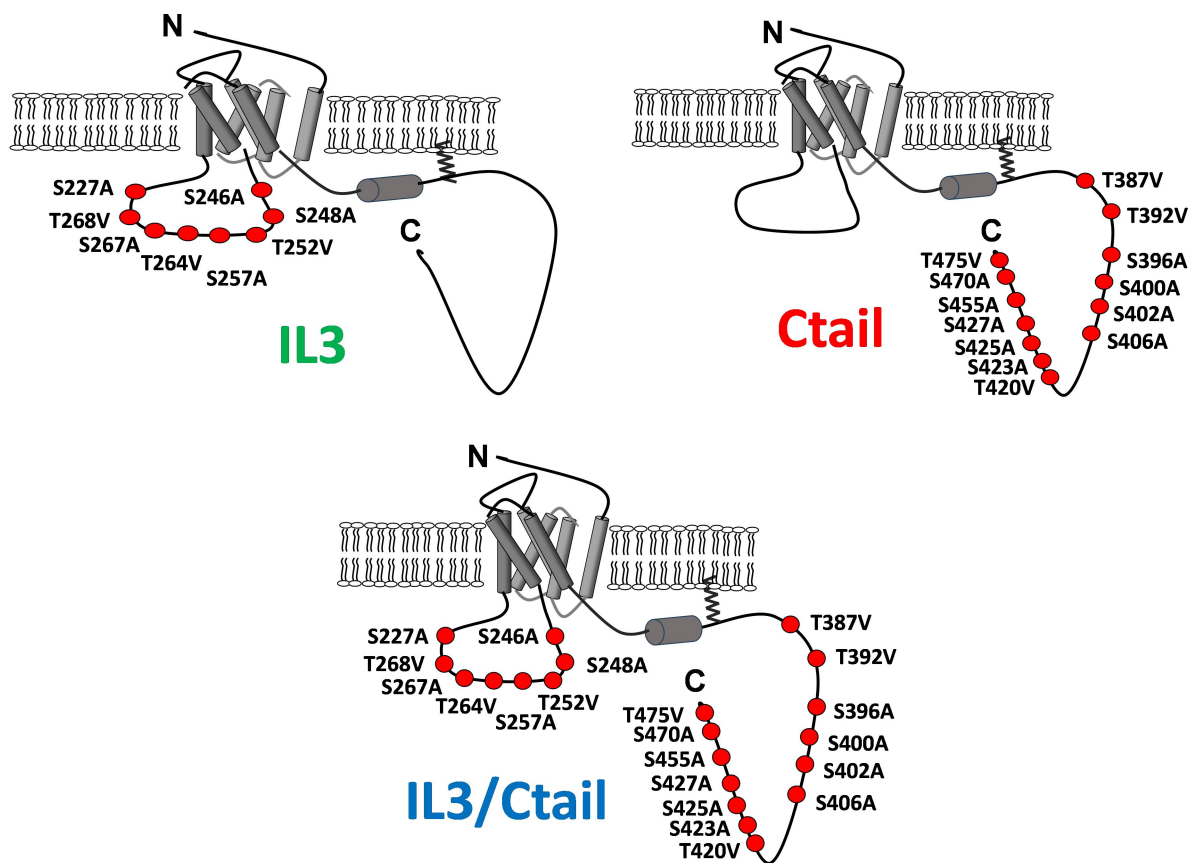

**Figure S2** Representative autoradiograph of the phosphorylation of the WT and mutant  $\alpha_{1B}$ -ARs run in parallel.

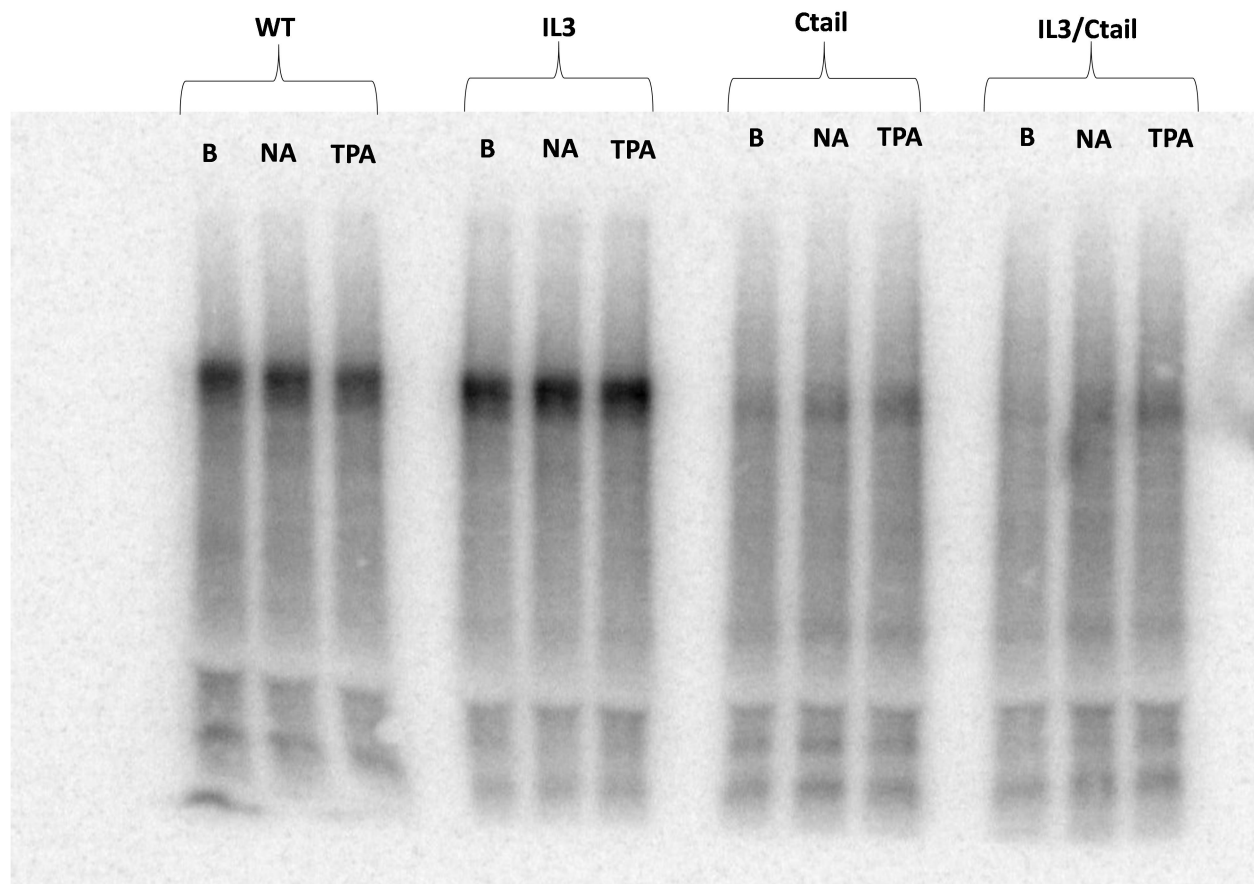

**Figure S3.** Representative intracellular calcium tracings of cells expressing the WT and mutant  $\alpha_{1B}$ -ARs pre-incubated without any agent or for 5 or 10 min with 10  $\mu$ M NA. Cells were washed and rechallenge with 10  $\mu$ M NA (homologous desensitization) and subsequently with 1  $\mu$ M LPA.

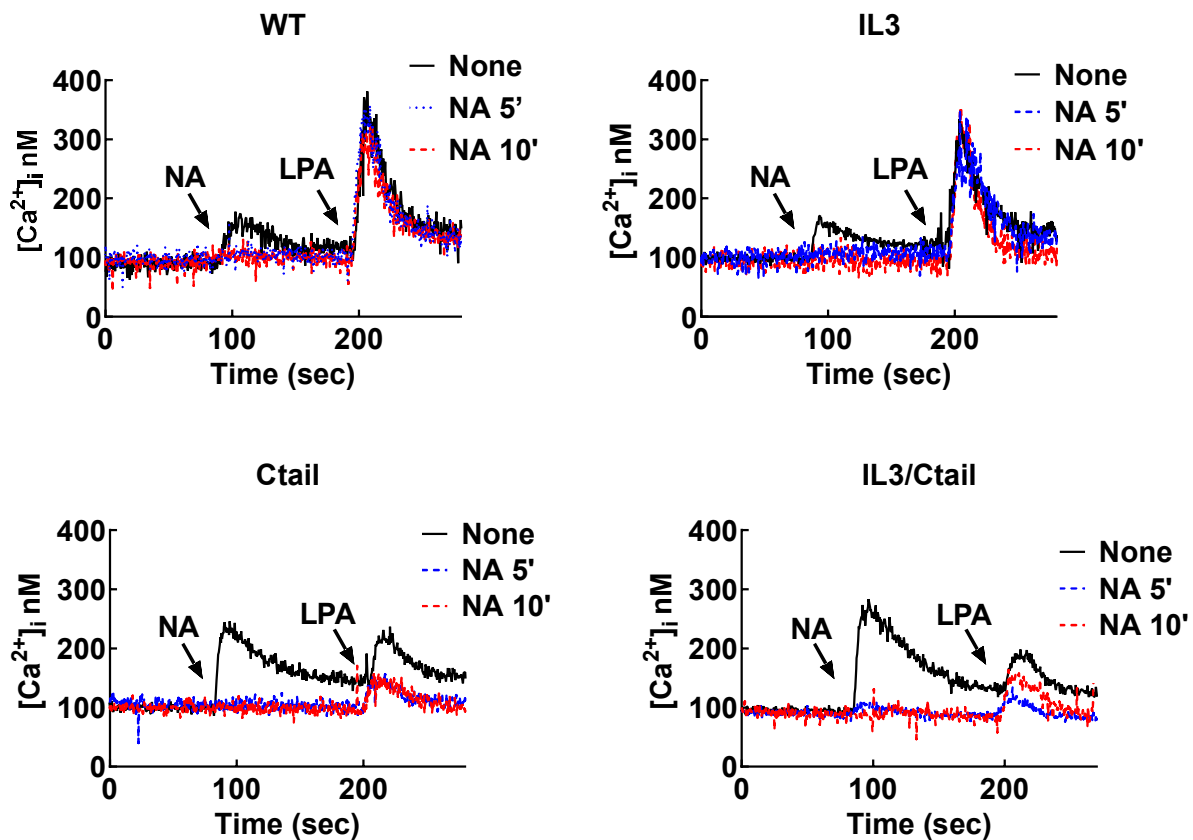

**Figure S4.** Representative intracellular calcium tracings of cells expressing the WT and mutant  $\alpha_{1B}$ -ARs. Cells were pre-incubated without any agent or for 5 or 10 min with 1  $\mu$ M PMA (heterologous desensitization) and subsequently challenged with 10  $\mu$ M NA.

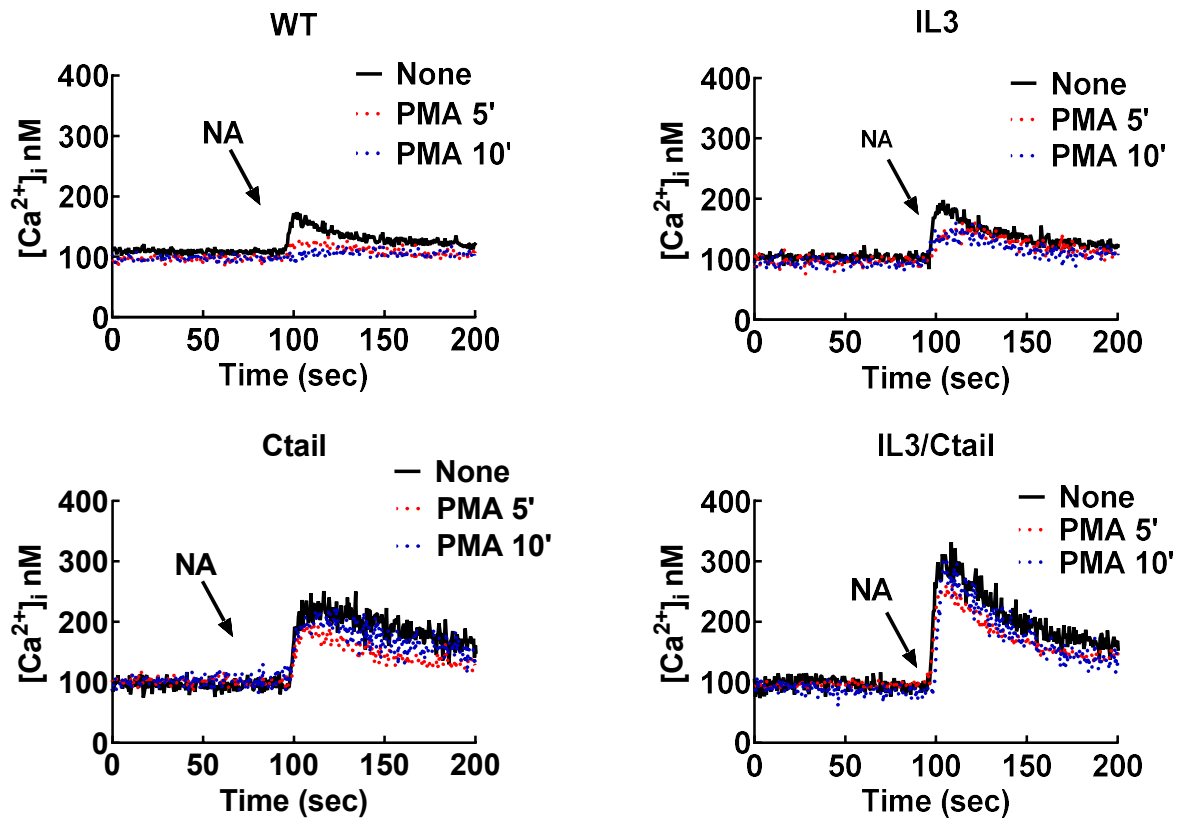

**Figure S5.** NA-induced ERK phosphorylation (5 and 60 min) in cells expressing the WT  $\alpha_{1B}$ -AR, the IL3, the Ctail, or the IL3/ Ctail mutants. The means are plotted, and error bars indicate the S.E.M. of 5 experiments performed on different days using different cell cultures. \*\*\*  $p < 0.001$  and \*\*  $p < 0.05$  vs. cells expressing other receptors, same time of incubation. Representative Western blots are shown above the graph.

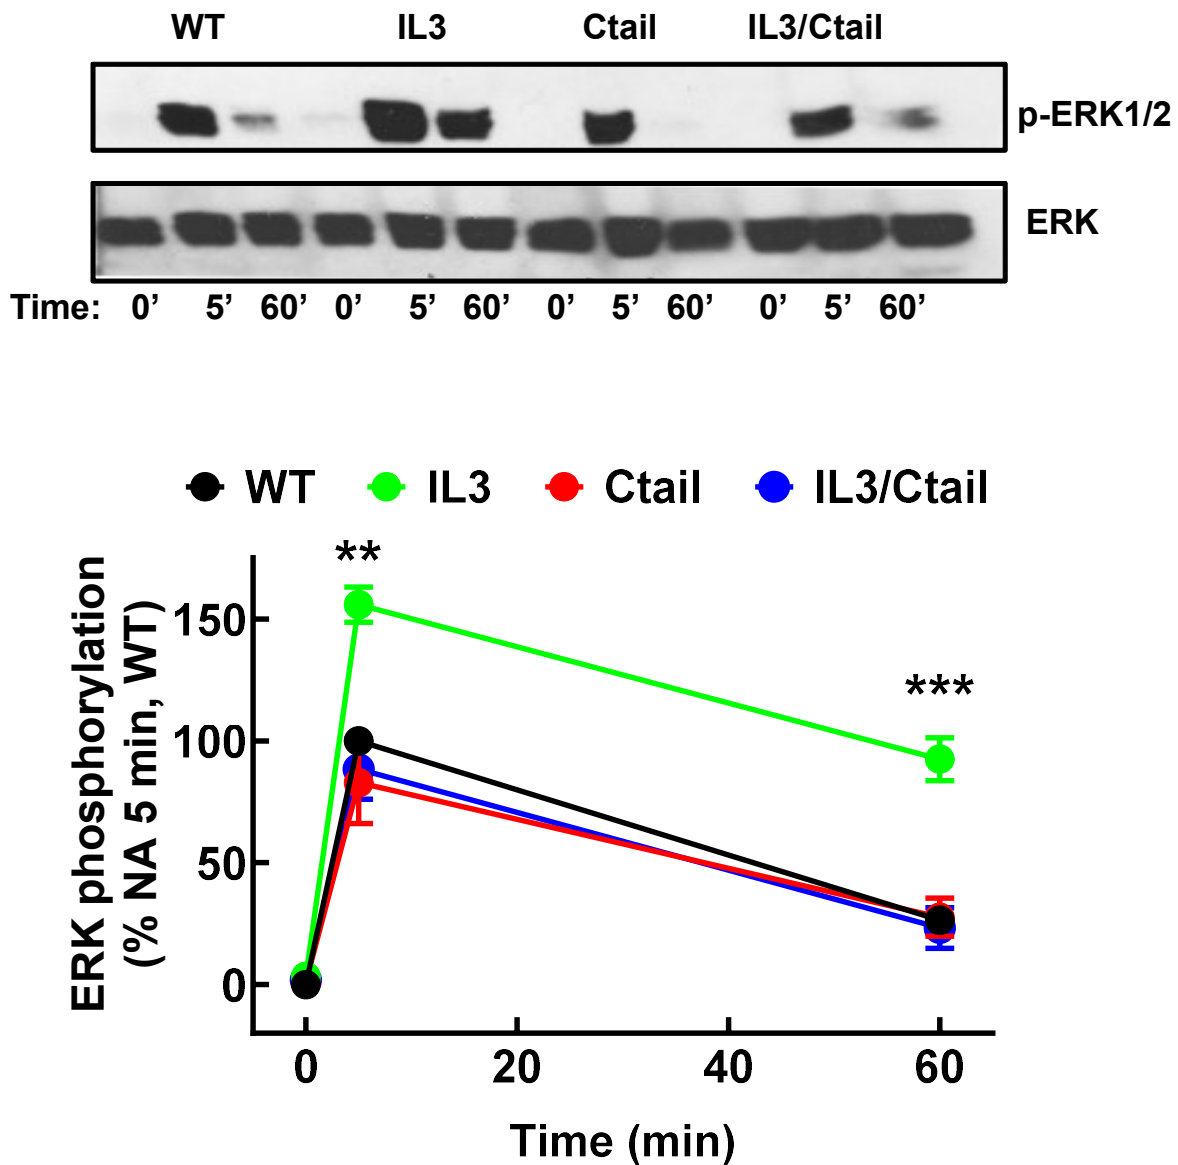

**Figure S6.** PMA-induced ERK phosphorylation (5 and 60 min) in cells expressing the WT  $\alpha_{1B}$ -AR, the IL3, the Ctail, or the IL3/ Ctail mutants. The means are plotted, and error bars indicate the S.E.M. of 5 experiments performed on different days using different cell cultures. \*\*\*  $p < 0.001$  vs. IL3- or Ctail-expressing cells, same time; \*\*  $p < 0.05$  vs. cells expressing other receptor constructs, same time. Representative Western blots are shown above the graph.

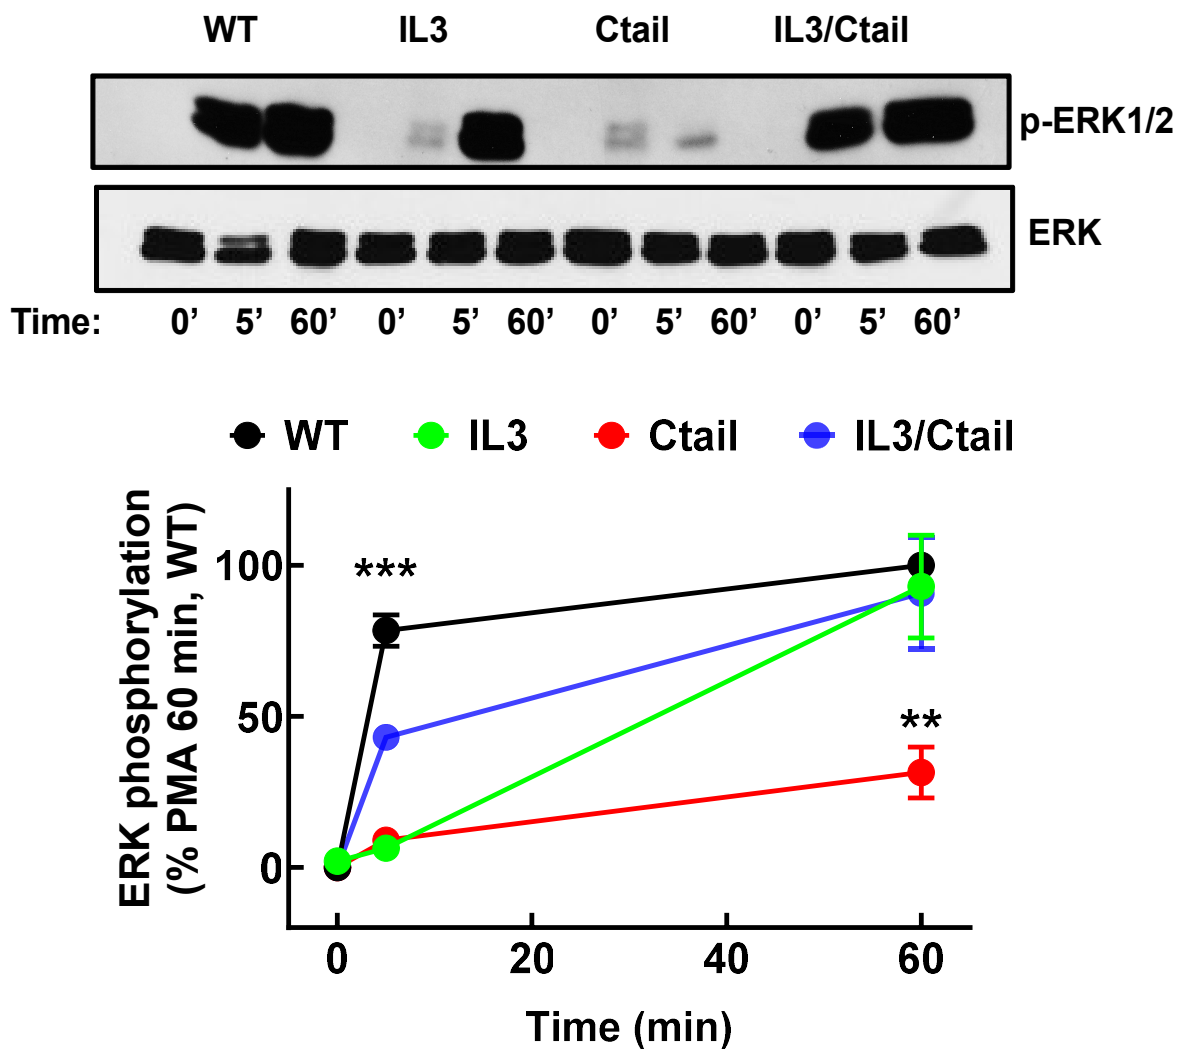

**Table S1**

**Qualitative assessment of the functional repercussion of the distinct  $\alpha_{1B}$ -AR mutations on the parameters studied as compared to the wild-type.**

| <b>Parameter</b>                                    | <b>IL3</b>                    | <b>Ctail</b>                | <b>IL3/ Ctail</b>             |
|-----------------------------------------------------|-------------------------------|-----------------------------|-------------------------------|
| <b>Baseline Receptor Phosphorylation</b>            | =                             | ↓↓                          | ↓↓/↓↓↓                        |
| <b>NA- and PMA-induced Receptor Phosphorylation</b> | =                             | ↓↓                          | ↓↓↓                           |
| <b>NA action on [Ca<sup>2+</sup>] i</b>             | EC <sub>50</sub> ↓<br>Max =   | EC <sub>50</sub> ↓<br>Max = | EC <sub>50</sub> ↓↓<br>Max ↑↑ |
| <b>[Ca<sup>2+</sup>] i Desensibilization</b>        | NA =<br>PMA ↓                 | NA =<br>PMA ↓↓↓             | NA =<br>PMA ↓↓↓               |
| <b>Receptor internalization</b>                     | NA ↓<br>PMA ↓                 | NA ↓↓↓<br>PMA ↓↓↓           | NA ↓↓↓<br>PMA ↓↓↓             |
| <b>ERK 1/2 phosphorylation</b>                      | NA ↑↑<br><br>PMA ↓<br>delayed | NA =<br><br>PMA ↓↓          | NA =<br><br>PMA ↓ delayed     |
